# Supplementary material
Source: PubMed Central journal article supplement (PMC4036217)
Supplement: supp_kwu066_kwu066supp.pdf [file supp_kwu066_kwu066supp.pdf]

## **WEB APPENDIX**

### **Assessment of Health History**

Participants in the Survey of the Health of Wisconsin (SHOW) self-reported their health history. Specifically, respondents were asked orally whether a doctor or other health professional had ever told them they had congestive heart failure, a heart attack, a stroke, high cholesterol, diabetes, high blood pressure, asthma, chronic bronchitis, allergies, or cancer. Respondents were also given a list and asked to report whether a doctor or other health professional had ever told them they had alcohol abuse, Alzheimer's disease, anemia, anxiety, autism spectrum disorder, celiac disease, chlamydia, Crohn's disease, chronic kidney disease, depression, drug abuse, eczema, epilepsy, gonorrhea, hepatitis, herpes type 1/cold sores, HIV infection/AIDS, human papilloma virus (HPV), irritable bowel syndrome, kidney stones, learning disability, Lyme disease, migraines, mild cognitive impairment, multiple sclerosis, osteoarthritis, osteoporosis, Parkinson's disease, post-traumatic stress disorder, psoriasis, acid reflux, rheumatoid arthritis, shingles or chicken pox, stomach or intestinal ulcer, syphilis, tuberculosis, urinary incontinence or urinary tract infections. The number of health conditions was evaluated by summing the total number of conditions the participant endorsed.

**Web Table 1. Full regression models of the association between duration of caregiving and telomere length**

|                                    | $\beta^a$ | SE        | <i>P</i> value |
|------------------------------------|-----------|-----------|----------------|
| (Intercept)                        | -0.13     | 0.20      |                |
| Duration of Care (log-transformed) | -0.02     | 0.02      | 0.34           |
| Age, years                         | -0.01     | 0.00      | 0.02           |
| Sex                                |           |           |                |
| Female                             | -0.08     | 0.07      | 0.24           |
| Male                               |           | REFERENCE |                |
| Race/Ethnicity                     |           |           |                |
| White (non-Hispanic)               | 0.00      | 0.11      | 0.99           |
| Other                              |           | REFERENCE |                |
| Educational Attainment             |           |           |                |
| <12 years                          |           | REFERENCE |                |
| $\geq 12$ years                    | 0.20      | 0.08      | 0.01           |
| No. of Adults in the Household     | 0.07      | 0.03      | 0.05           |
| No. of Health Conditions           | 0.04      | 0.02      | 0.02           |
| No. of Prescription Medications    |           |           |                |
| 0                                  |           | REFERENCE |                |
| $\geq 1$                           | -0.18     | 0.08      | 0.03           |
| Caregiver Status                   |           |           |                |
| Current                            | 0.04      | 0.08      | 0.59           |
| Former (past 12 months)            |           | REFERENCE |                |
| No. of Care Recipients             |           |           |                |
| 1                                  |           | REFERENCE |                |
| >1                                 | -0.04     | 0.08      | 0.62           |

SE, standard error.

<sup>a</sup>For continuous covariates, the estimate represents change in log(T/S) per unit increase or per doubling of the covariate, as indicated; for categorical covariates, the estimate represents the difference from the reference group.

**Web Table 2. Full regression models of the association between hours per week of caregiving and telomere length**

|                                    | $\beta^a$ | SE        | P value |
|------------------------------------|-----------|-----------|---------|
| (Intercept)                        | -0.01     | 0.22      |         |
| Duration of Care (log-transformed) | -0.06     | 0.02      | 0.00    |
| Age, years                         | -0.01     | 0.00      | 0.02    |
| Sex                                |           |           |         |
| Female                             | -0.05     | 0.06      | 0.48    |
| Male                               |           | REFERENCE |         |
| Race/Ethnicity                     |           |           |         |
| White (non-Hispanic)               | 0.00      | 0.10      | 0.99    |
| Other                              |           | REFERENCE |         |
| Educational Attainment             |           |           |         |
| <12 years                          |           | REFERENCE |         |
| $\geq 12$ years                    | 0.23      | 0.08      | 0.01    |
| No. of Adults in the Household     | 0.06      | 0.03      | 0.08    |
| No. of Health Conditions           | 0.05      | 0.02      | 0.02    |
| No. of Prescription Medications    |           |           |         |
| 0                                  |           | REFERENCE |         |
| $\geq 1$                           | -0.18     | 0.09      | 0.04    |
| Caregiver Status                   |           |           |         |
| Current                            | -0.04     | 0.07      | 0.55    |
| Former (past 12 months)            |           | REFERENCE |         |
| No. of Care Recipients             |           |           |         |
| 1                                  |           | REFERENCE |         |
| >1                                 | -0.02     | 0.08      | 0.80    |

SE, standard error.

<sup>a</sup>For continuous covariates, the estimate represents change in log(T/S) per unit increase or per doubling of the covariate, as indicated; for categorical covariates, the estimate represents the difference from the reference group.

**Web Table 3. Full regression models of the association between relationship with the care recipient and telomere length**

|                                  | $\beta^a$ | SE        | P value |
|----------------------------------|-----------|-----------|---------|
| (Intercept)                      | -0.11     | 0.28      |         |
| Relationship with Care Recipient |           |           |         |
| Spouse                           |           | REFERENCE |         |
| Adult-Child                      | 0.07      | 0.06      | 0.30    |
| Parent                           | -0.12     | 0.10      | 0.25    |
| Other                            | 0.09      | 0.10      | 0.37    |
| Age, years                       | -0.01     | 0.00      | 0.04    |
| Sex                              |           |           |         |
| Female                           | -0.09     | 0.07      | 0.18    |
| Male                             |           | REFERENCE |         |
| Marital Status                   |           |           |         |
| Married/Partnered                |           | REFERENCE |         |
| Divorced/Widowed/Separated       | 0.15      | 0.07      | 0.05    |
| Never Married                    | -0.10     | 0.16      | 0.54    |
| Race/Ethnicity                   |           |           |         |
| White (non-Hispanic)             | -0.04     | 0.12      | 0.75    |
| Other                            |           | REFERENCE |         |
| Educational Attainment           |           |           |         |
| <12 years                        |           | REFERENCE |         |
| $\geq 12$ years                  | 0.20      | 0.09      | 0.02    |
| No. of Adults in the Household   | 0.09      | 0.03      | 0.01    |
| No. of Children in the Household | -0.02     | 0.05      | 0.71    |
| No. of Health Conditions         | 0.04      | 0.02      | 0.03    |
| No. of Prescription Medications  |           |           |         |
| 0                                |           | REFERENCE |         |
| $\geq 1$                         | -0.17     | 0.08      | 0.03    |
| Caregiver Status                 |           |           |         |
| Current                          | 0.02      | 0.07      | 0.75    |
| Former (past 12 months)          |           | REFERENCE |         |
| No. of Care Recipients           |           |           |         |
| 1                                |           | REFERENCE |         |
| >1                               | -0.06     | 0.08      | 0.43    |

SE, standard error.

<sup>a</sup>For continuous covariates, the estimate represents change in log(T/S) per unit increase or per doubling of the covariate, as indicated; for categorical covariates, the estimate represents the difference from the reference group.

**Web Table 4. Full regression models of the association between distance from the care recipient and telomere length**

|                                  | $\beta^a$ | SE        | P value |
|----------------------------------|-----------|-----------|---------|
| (Intercept)                      | -0.07     | 0.32      |         |
| Distance from Care Recipient     |           |           |         |
| Co-resident                      |           | REFERENCE |         |
| $\leq 20$ minutes                | 0.06      | 0.07      | 0.39    |
| $> 20$ minutes                   | -0.02     | 0.08      | 0.84    |
| Age, years                       | -0.01     | 0.00      | 0.03    |
| Sex                              |           |           |         |
| Female                           | -0.09     | 0.07      | 0.18    |
| Male                             |           | REFERENCE |         |
| Employment Status                |           |           |         |
| Employed                         | -0.03     | 0.07      | 0.65    |
| Unemployed                       |           | REFERENCE |         |
| Marital Status                   |           |           |         |
| Married/Partnered                |           | REFERENCE |         |
| Divorced/Widowed/Separated       | 0.16      | 0.09      | 0.10    |
| Never Married                    | -0.08     | 0.16      | 0.64    |
| Race/Ethnicity                   |           |           |         |
| White (non-Hispanic)             | -0.02     | 0.11      | 0.85    |
| Other                            |           | REFERENCE |         |
| Educational Attainment           |           |           |         |
| $< 12$ years                     |           | REFERENCE |         |
| $\geq 12$ years                  | 0.22      | 0.08      | 0.01    |
| Income (log-transformed)         | 0.03      | 0.05      | 0.57    |
| No. of Adults in the Household   | 0.09      | 0.03      | 0.01    |
| No. of Children in the Household | -0.03     | 0.05      | 0.51    |
| No. of Health Conditions         | 0.04      | 0.02      | 0.05    |
| No. of Prescription Medications  |           |           |         |
| 0                                |           | REFERENCE |         |
| $\geq 1$                         | -0.18     | 0.08      | 0.03    |
| Caregiver Status                 |           |           |         |
| Current                          | 0.01      | 0.07      | 0.84    |
| Former (past 12 months)          |           | REFERENCE |         |
| No. of Care Recipients           |           |           |         |
| 1                                |           | REFERENCE |         |
| $> 1$                            | -0.05     | 0.08      | 0.55    |

SE, standard error.

<sup>a</sup>For continuous covariates, the estimate represents change in log(T/S) per unit increase or per doubling of the covariate, as indicated; for categorical covariates, the estimate represents the difference from the reference group.

**Web Table 5. Full regression models of the association between care recipient condition and telomere length**

|                                  | $\beta^a$ | SE        | <i>P</i> value |
|----------------------------------|-----------|-----------|----------------|
| (Intercept)                      | -0.07     | 0.27      |                |
| Care Recipient's Condition       |           |           |                |
| Dementia                         | 0.07      | 0.09      | 0.45           |
| Recovery from Surgery            | -0.13     | 0.21      | 0.54           |
| Other                            |           | REFERENCE |                |
| Age, years                       | -0.01     | 0.00      | 0.03           |
| Sex                              |           |           |                |
| Female                           | -0.10     | 0.07      | 0.13           |
| Male                             |           | REFERENCE |                |
| Marital Status                   |           |           |                |
| Married/Partnered                |           | REFERENCE |                |
| Divorced/Widowed/Separated       | 0.15      | 0.08      | 0.07           |
| Never Married                    | -0.06     | 0.17      | 0.73           |
| Race/Ethnicity                   |           |           |                |
| White (non-Hispanic)             | 0.00      | 0.12      | 0.97           |
| Other                            |           | REFERENCE |                |
| Educational Attainment           |           |           |                |
| <12 years                        |           | REFERENCE |                |
| ≥12 years                        | 0.23      | 0.08      | 0.01           |
| No. of Adults in the Household   | 0.09      | 0.03      | 0.01           |
| No. of Children in the Household | -0.03     | 0.05      | 0.57           |
| No. of Health Conditions         | 0.04      | 0.02      | 0.02           |
| No. of Prescription Medications  |           |           |                |
| 0                                |           | REFERENCE |                |
| ≥1                               | -0.17     | 0.08      | 0.03           |
| Caregiver Status                 |           |           |                |
| Current                          | -0.02     | 0.06      | 0.71           |
| Former (past 12 months)          |           | REFERENCE |                |
| No. of Care Recipients           |           |           |                |
| 1                                |           | REFERENCE |                |
| >1                               | -0.03     | 0.07      | 0.68           |

SE, standard error.

<sup>a</sup>For continuous covariates, the estimate represents change in log(T/S) per unit increase or per doubling of the covariate, as indicated; for categorical covariates, the estimate represents the difference from the reference. group.

**Web Table 6. Full regression models of the association between care recipient age and telomere length**

|                                 | $\beta^a$ | SE        | P value |
|---------------------------------|-----------|-----------|---------|
| (Intercept)                     | -0.07     | 0.22      |         |
| Care Recipient's Age, years     |           |           |         |
| <25                             | -0.29     | 0.08      | 0.00    |
| 25-44                           | -0.12     | 0.10      | 0.21    |
| 45-64                           | -0.08     | 0.09      | 0.37    |
| 65-84                           | -0.08     | 0.09      | 0.38    |
| $\geq 85$                       |           | REFERENCE |         |
| Age, years                      | -0.01     | 0.00      | 0.01    |
| Sex                             |           |           |         |
| Female                          | -0.09     | 0.06      | 0.17    |
| Male                            |           | REFERENCE |         |
| Marital Status                  |           |           |         |
| Married/Partnered               |           | REFERENCE |         |
| Divorced/Widowed/Separated      | 0.19      | 0.08      | 0.01    |
| Never Married                   | -0.06     | 0.15      | 0.67    |
| Race/Ethnicity                  |           |           |         |
| White (non-Hispanic)            | -0.01     | 0.11      | 0.96    |
| Other                           |           | REFERENCE |         |
| Educational Attainment          |           |           |         |
| <12 years                       |           | REFERENCE |         |
| $\geq 12$ years                 | 0.22      | 0.08      | 0.01    |
| No. of Adults in the Household  | 0.11      | 0.03      | 0.00    |
| No. of Health Conditions        | 0.04      | 0.02      | 0.04    |
| No. of Prescription Medications |           |           |         |
| 0                               |           | REFERENCE |         |
| $\geq 1$                        | -0.15     | 0.08      | 0.05    |
| Caregiver Status                |           |           |         |
| Current                         | 0.01      | 0.06      | 0.91    |
| Former (past 12 months)         |           | REFERENCE |         |
| No. of Care Recipients          |           |           |         |
| 1                               |           | REFERENCE |         |
| >1                              | 0.00      | 0.07      | 0.97    |

SE, standard error.

<sup>a</sup>For continuous covariates, the estimate represents change in log(T/S) per unit increase or per doubling of the covariate, as indicated; for categorical covariates, the estimate represents the difference from the reference group.

**Web Table 7. Full regression models of the association between all caregiving characteristics and telomere length**

|                                    | $\beta^a$ | SE        | <i>P</i> value |
|------------------------------------|-----------|-----------|----------------|
| Intercept                          | 0.26      | 0.25      |                |
| Duration of Care (log-transformed) | -0.03     | 0.02      | 0.12           |
| Hours per Week (log-transformed)   | -0.08     | 0.03      | 0.00           |
| Relationship with Care Recipient   |           |           |                |
| Spouse                             |           | REFERENCE |                |
| Adult-Child (caring for a parent)  | 0.11      | 0.11      | 0.29           |
| Parent (caring for a child)        | -0.02     | 0.10      | 0.83           |
| Other                              | 0.17      | 0.12      | 0.13           |
| Distance from Care Recipient       |           |           |                |
| Co-resident                        |           | REFERENCE |                |
| ≤20 minutes                        | -0.16     | 0.08      | 0.03           |
| >20 minutes                        | -0.23     | 0.11      | 0.03           |
| Care Recipient's Condition         |           |           |                |
| Dementia                           | 0.05      | 0.08      | 0.54           |
| Recovering from surgery            | -0.17     | 0.20      | 0.40           |
| Other                              |           | REFERENCE |                |
| Care Recipient's Age, years        |           |           |                |
| <25                                | -0.23     | 0.10      | 0.02           |
| 25-44                              | 0.00      | 0.12      | 0.99           |
| 45-64                              | -0.04     | 0.12      | 0.71           |
| 65-84                              | -0.01     | 0.08      | 0.85           |
| ≥85                                |           | REFERENCE |                |
| Caregiver Status                   |           |           |                |
| Current                            | -0.04     | 0.06      | 0.51           |
| Former (past 12 months)            |           | REFERENCE |                |
| No. of Care Recipients             |           |           |                |
| 1                                  |           | REFERENCE |                |
| >1                                 | -0.03     | 0.07      | 0.66           |
| Care Recipient Sex                 |           |           |                |
| Male                               |           | REFERENCE |                |
| Female                             | -0.05     | 0.07      | 0.46           |
| Age, years                         | -0.01     | 0.00      | 0.03           |

(Table continues)



|                                 |       |           |      |  |
|---------------------------------|-------|-----------|------|--|
| Sex                             |       |           |      |  |
| Female                          | -0.05 | 0.06      | 0.40 |  |
| Male                            |       | REFERENCE |      |  |
| Race/Ethnicity                  |       |           |      |  |
| White (non-Hispanic)            | 0.04  | 0.11      | 0.72 |  |
| Other                           |       | REFERENCE |      |  |
| Marital Status                  |       |           |      |  |
| Married/Partnered               |       | REFERENCE |      |  |
| Divorced/Widowed/Separated      | 0.13  | 0.08      | 0.08 |  |
| Never Married                   | -0.05 | 0.15      | 0.76 |  |
| Educational Attainment          |       |           |      |  |
| <12 years                       |       | REFERENCE |      |  |
| ≥12 years                       | 0.19  | 0.08      | 0.02 |  |
| No. of Adults in the Household  | 0.07  | 0.04      | 0.06 |  |
| Employment Status               |       |           |      |  |
| Employed                        | -0.11 | 0.07      | 0.14 |  |
| Unemployed                      |       | REFERENCE |      |  |
| No. of Health Conditions        | 0.03  | 0.02      | 0.08 |  |
| No. of Prescription Medications |       |           |      |  |
| 0                               |       | REFERENCE |      |  |
| ≥1                              | -0.16 | 0.07      | 0.03 |  |

---

SE, standard error.

<sup>a</sup>For continuous covariates, the estimate represents change in log(T/S) per unit increase or per doubling of the covariate, as indicated; for categorical covariates, the estimate represents the difference from the reference group.
